# Supplementary material
Source: publisher figshare collection journal article supplement (https://acs.figshare.com/ndownloader/files/3923398)
Supplement: Supplementary file 1 [file 3923398]

**SUPPORTING INFORMATION FOR:**

**Nanodiscs and Electrospray Ionization Mass Spectrometry. A Novel Tool for Screening  
Glycolipids Against Proteins**

Aneika C. Leney, Xuxin Fan, Elena N. Kitova and John S. Klassen

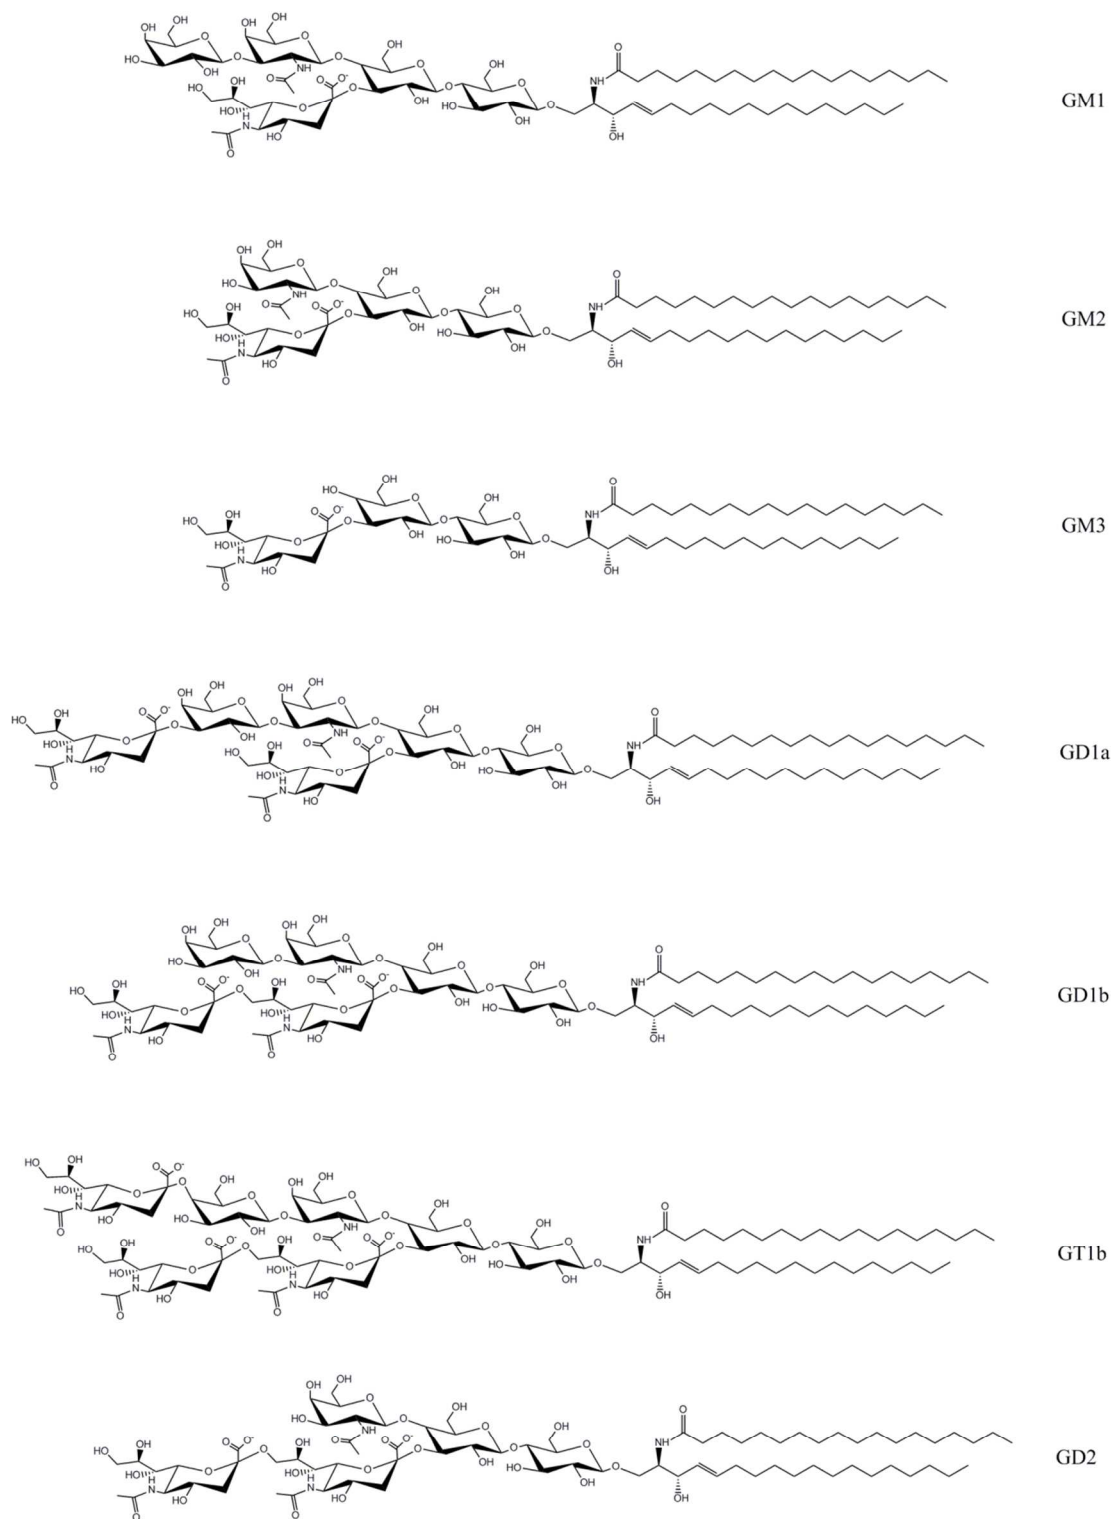

**Figure S1.** Structures of the gangliosides (GM1, GM2, GM3, GD1a, GD1b, GT1b and GD2) that were incorporated into nanodiscs (NDs) for the present study.

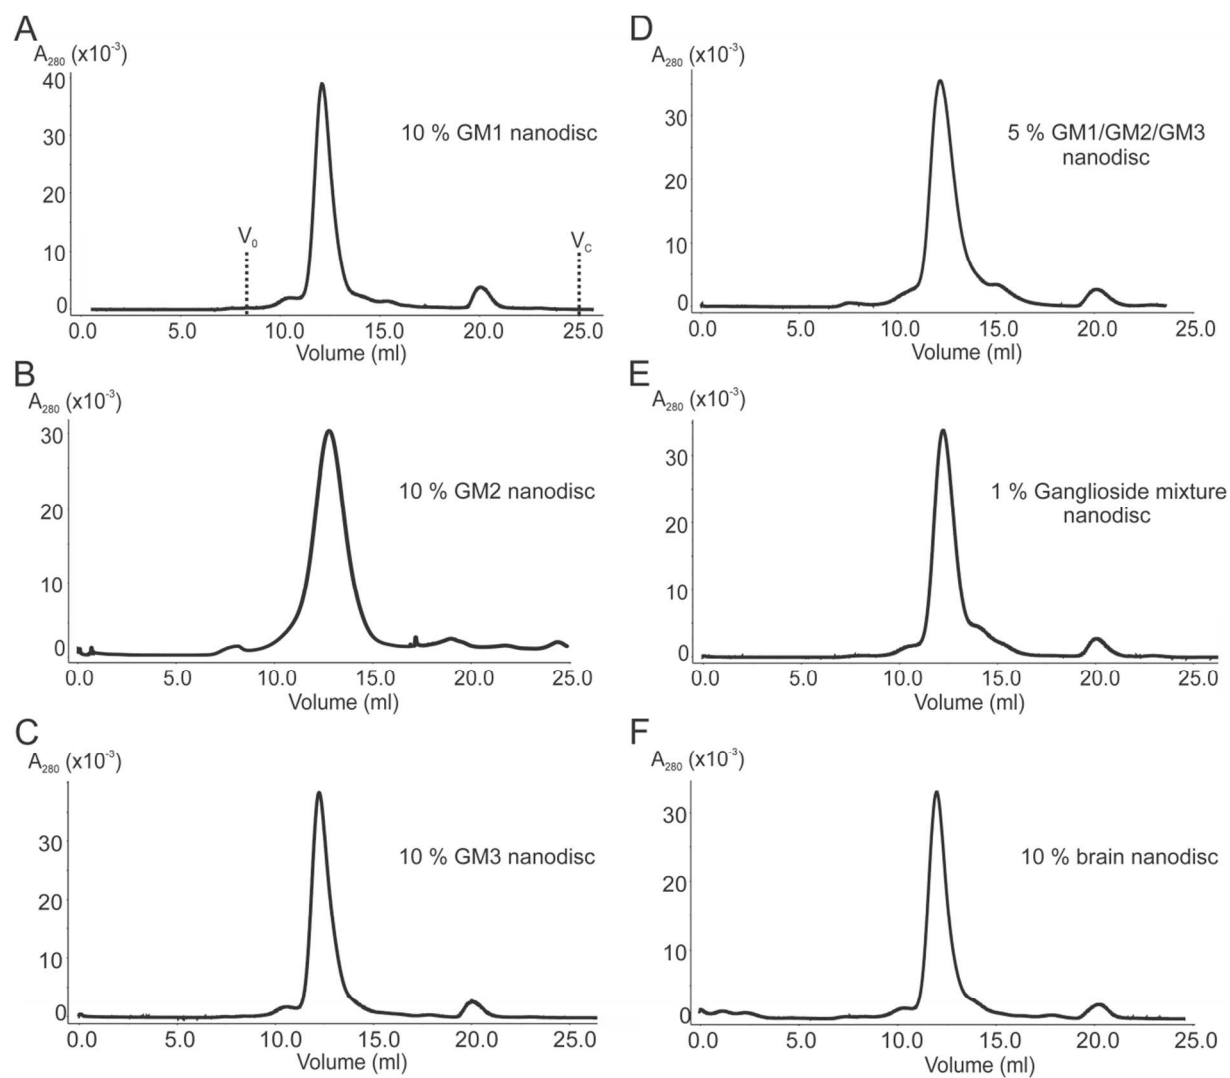

**Figure S2.** Size exclusion chromatography for 10% GM1 ND (A), 10% GM2 ND (B), 10% GM3 ND (C), 5% GM1/2/3 ND (D), 1% ganglioside mixture ND (7G ND) (E), and the ND containing gangliosides extracted from pig brain (pig ND) (F). The void volume ( $V_0$ ) and total column volume ( $V_c$ ) are shown as an example for the 10% GM1 ND (A).

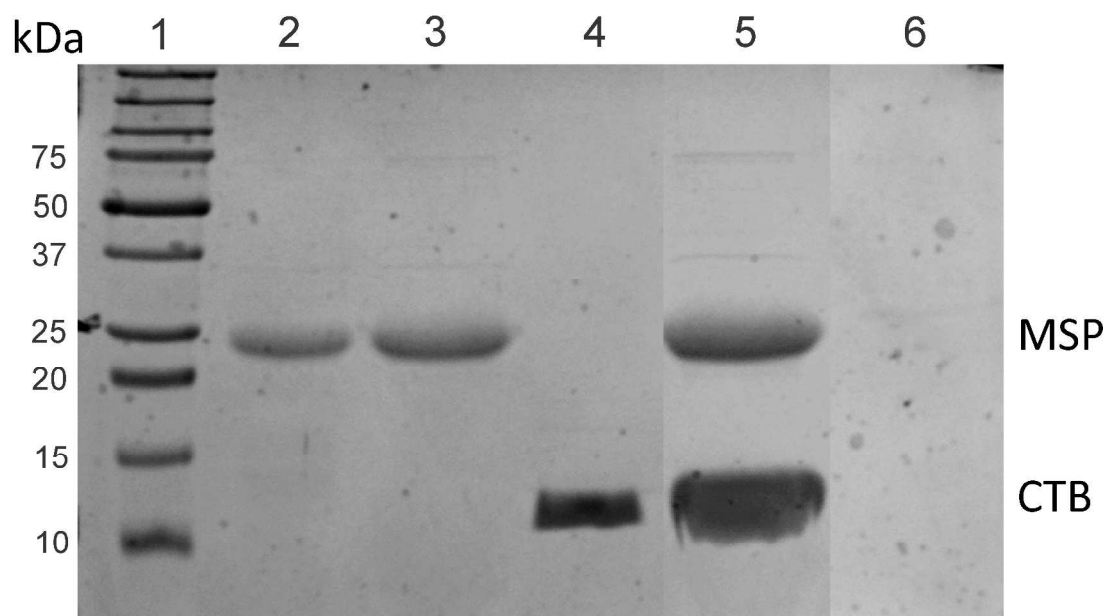

**Figure S3.** Evidence for binding of CTB<sub>5</sub> binding to GM1-containing NDs in solution. SDS-PAGE showing molecular weight markers (lane 1) and controls for MSP alone (lane 2), 10% GM1 ND (lane 3), CTB<sub>5</sub> (lane 4), and species that are  $\geq 100$  kDa (lane 5) and  $\leq 100$  kDa (lane 6) in solutions of CTB<sub>5</sub> and 10% GM1 ND. These data suggest that CTB<sub>5</sub> is fully bound to the GM1-containing NDs and the absence of free CTB<sub>5</sub>-GM1 complexes in solution.

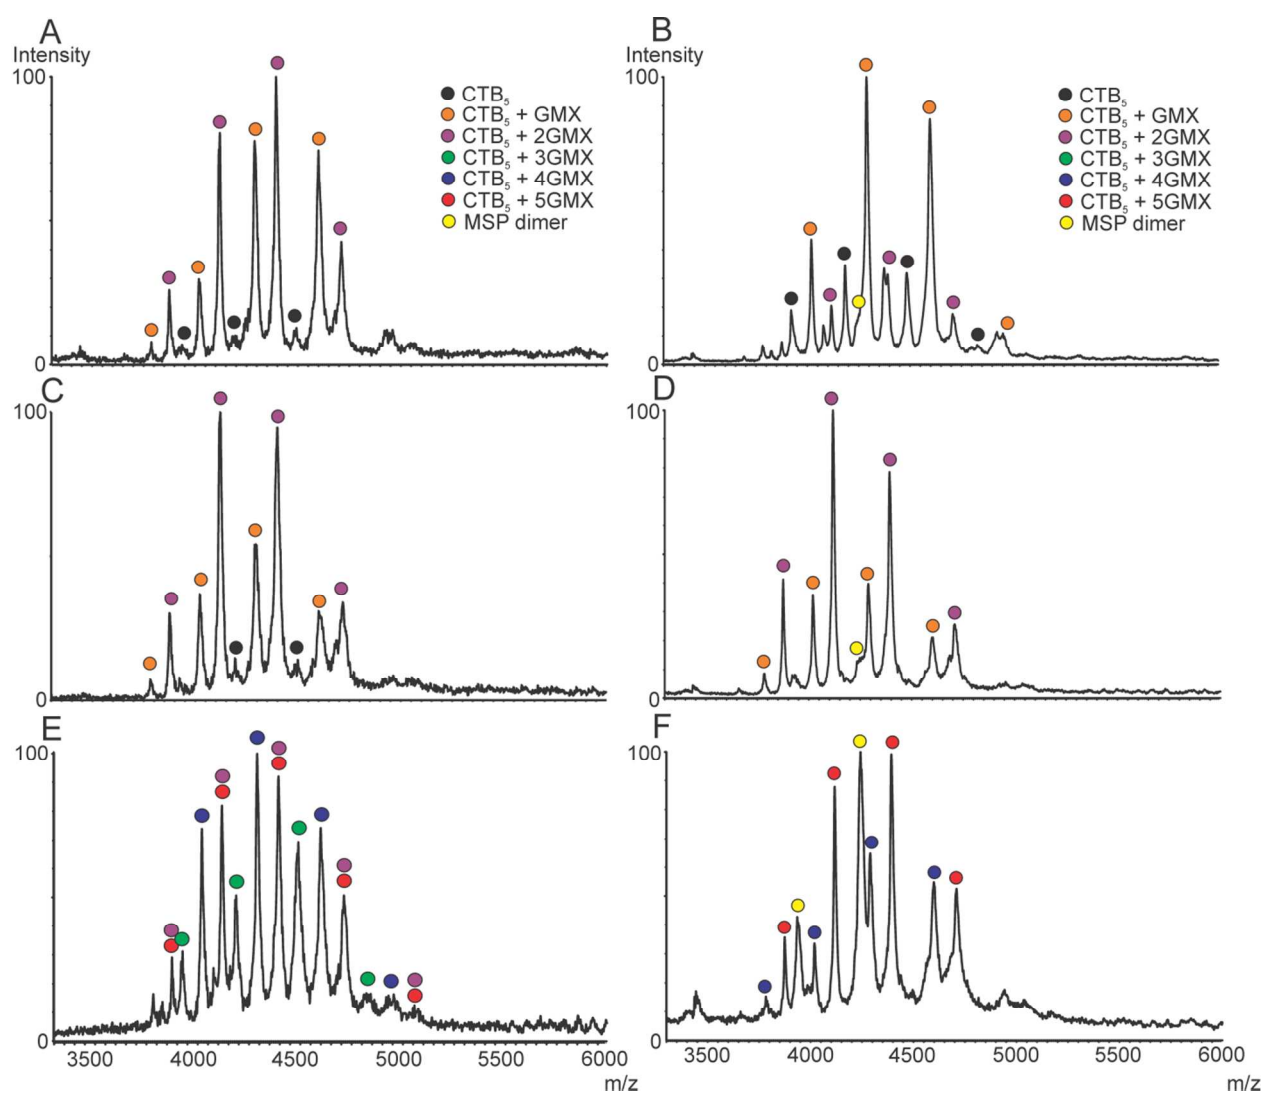

**Figure S4.** ESI-MS analysis of CTB<sub>5</sub> (5 μM) upon addition of 5 μM 1% GM1/GM2/GM3 ND (A), 1% GM1 + 1% GM2 ND + 1% GM3 ND (B), 2.5% GM1/2/3 ND (C), 2.5% GM1 ND + 2.5% GM2 ND + 2.5% GM3 ND (D), 5% GM1/2/3 ND (E) and 5% GM1 ND + 5% GM2 ND + 5% GM3 ND (F). The (CTB<sub>5</sub> + 5GM1), (CTB<sub>5</sub> + 4GM1), (CTB<sub>5</sub> + 3GM1), (CTB<sub>5</sub> + 2GM1), (CTB<sub>5</sub> + GM1), CTB<sub>5</sub> and MSP1E1 dimer ions are identified by the red, blue, green, purple, orange, black and yellow circles, respectively.

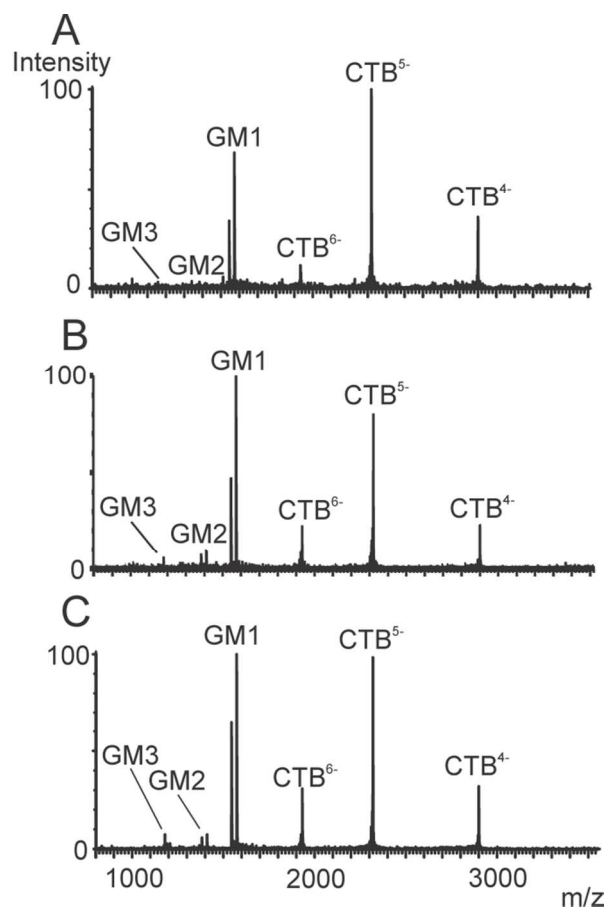

**Figure S5.** CID mass spectra measured for  $(\text{CTB}_5 + 2\text{GMX})^{13-}$  (A),  $(\text{CTB}_5 + 2\text{GMX})^{14-}$  (B) and  $(\text{CTB}_5 + 5\text{GMX})^{15-}$  (C) ions produced by ESI performed on solutions of CTB<sub>5</sub> (5  $\mu\text{M}$ ) and 5  $\mu\text{M}$  1% GM1 + GM2 + GM3 ND (A), 2.5% GM1 + GM2 + GM3 ND (B), and 5% GM1 + GM2 + GM3 ND (C). The collision energy used was 125 V in each case.

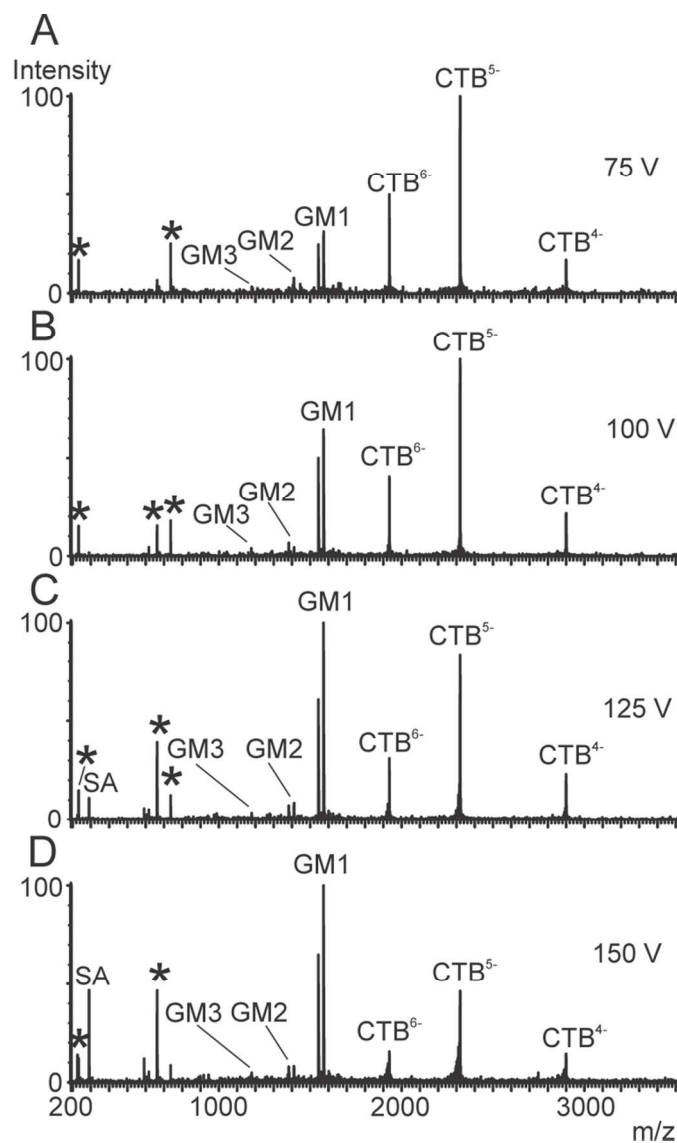

**Figure S6.** CID mass spectra measured for  $(\text{CTB}_5 + 5\text{GMX})^{15-}$  ions produced by ESI performed on solutions  $\text{CTB}_5$  (5  $\mu\text{M}$ ) and 5  $\mu\text{M}$  5% GM1 + 5% GM2 + 5% GM3 ND. The isolation window was centred at 4393 m/z. The collision energies used were 75V (A), 100V (B), 125V (C) and 150V (D). \* denotes peaks corresponding to DMPC ions or DMPC fragmentation products.

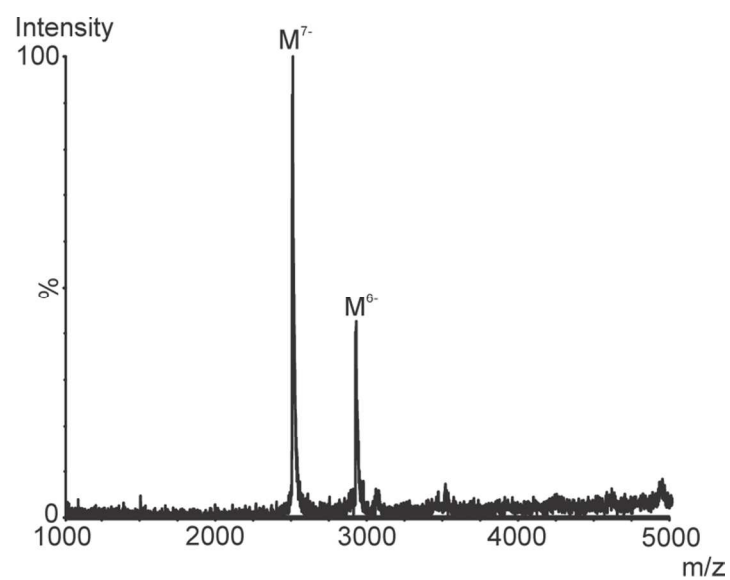

**Figure S7.** ESI-MS analysis of aqueous ammonium acetate solution of myoglobin (5  $\mu$ M) and 5% GM1 + GM2 + GM3 ND (5  $\mu$ M).



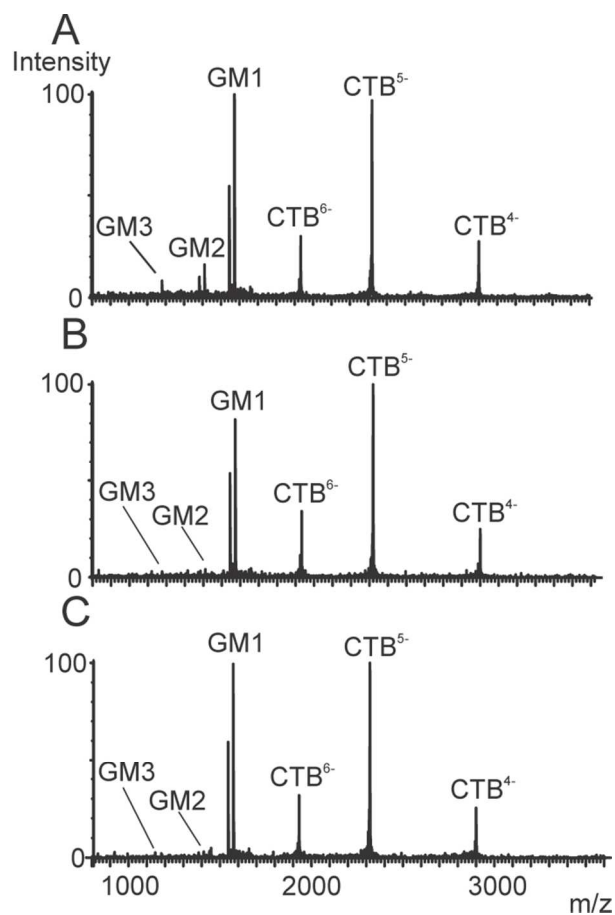

**Figure S8.** CID mass spectra measured for  $(\text{CTB}_5 + 2\text{GMX})^{14-}$  (A),  $(\text{CTB}_5 + 2\text{GMX})^{14-}$  (B) and  $(\text{CTB}_5 + 5\text{GMX})^{15-}$  (C) ions produced by ESI performed on solutions of CTB<sub>5</sub> (5  $\mu\text{M}$ ) and 5  $\mu\text{M}$  of 1% GM1/GM2/GM3 ND (A), 2.5% GM1/GM2/GM3 ND (B), and 5% GM1/GM2/GM3 ND (C). The collision energy used was 125V in each case.

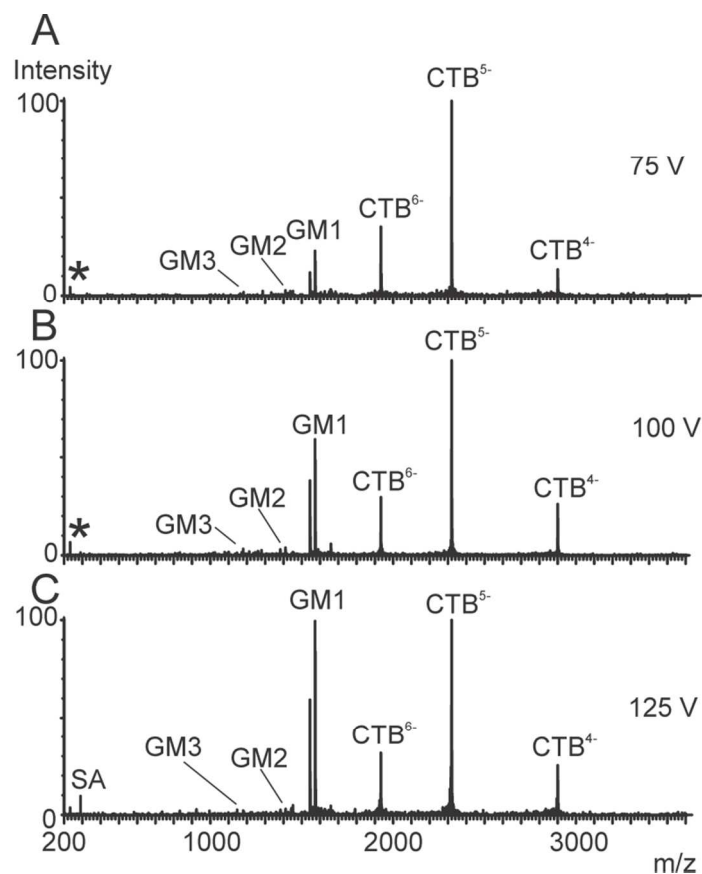

**Figure S9.** CID mass spectra measured for  $(\text{CTB}_5 + 5\text{GMX})^{15-}$  and  $(\text{CTB}_5 + 2\text{GMX})^{14-}$  produced by ESI performed on solutions  $\text{CTB}_5$  (5  $\mu\text{M}$ ) and 5  $\mu\text{M}$  of 5% GM1/GM2/GM3 ND. The isolation window was centred at 4380 m/z. The collision energies used were 75V (A), 100V (B) and 125V (C). \* denotes peaks corresponding to DMPC ions or DMPC fragmentation products.

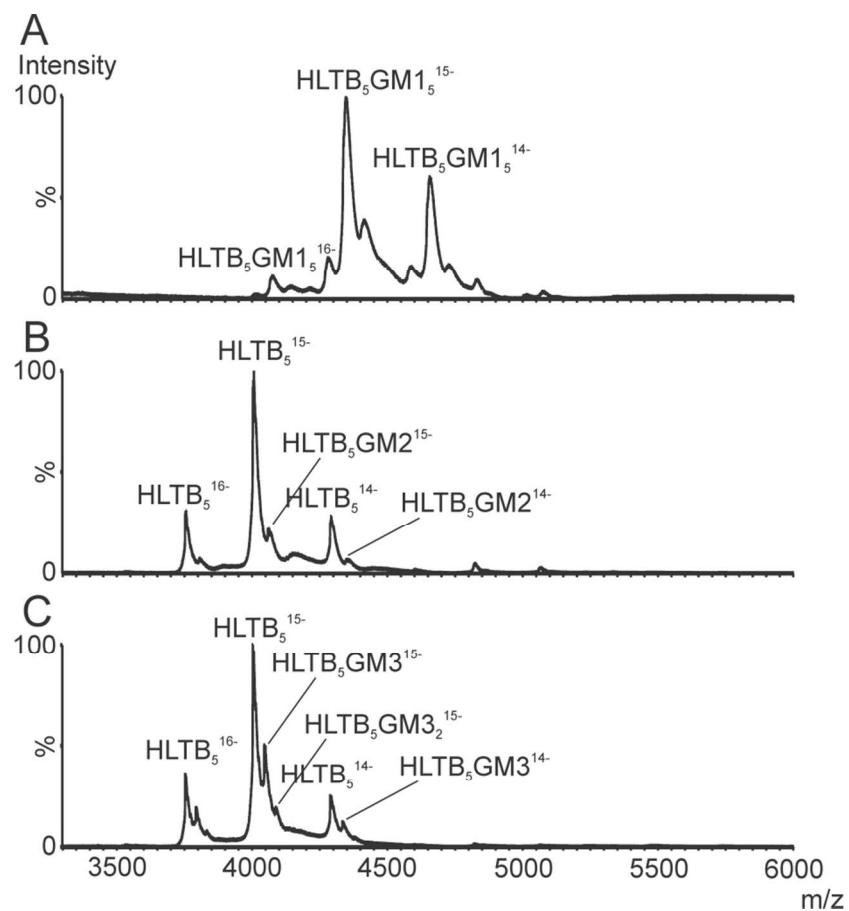

**Figure S10.** ESI-MS analysis of aqueous ammonium acetate solutions of HLTB<sub>5</sub> (5  $\mu$ M) and 50  $\mu$ M of the oligosaccharide of GM1 (A), GM2 (B) and GM3 (C).

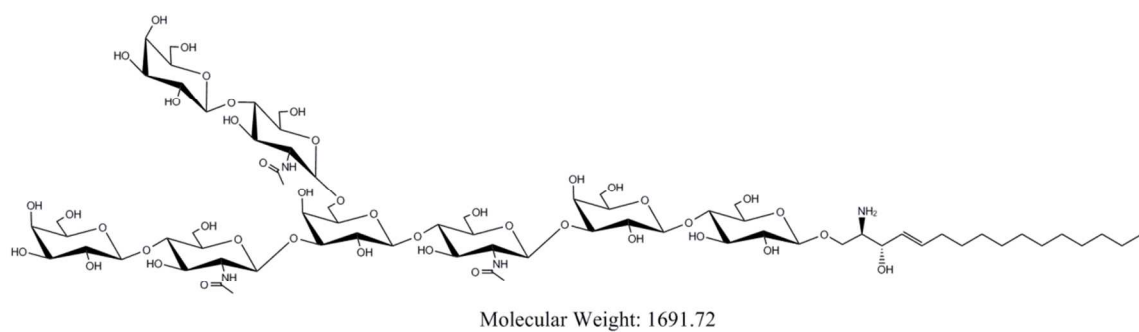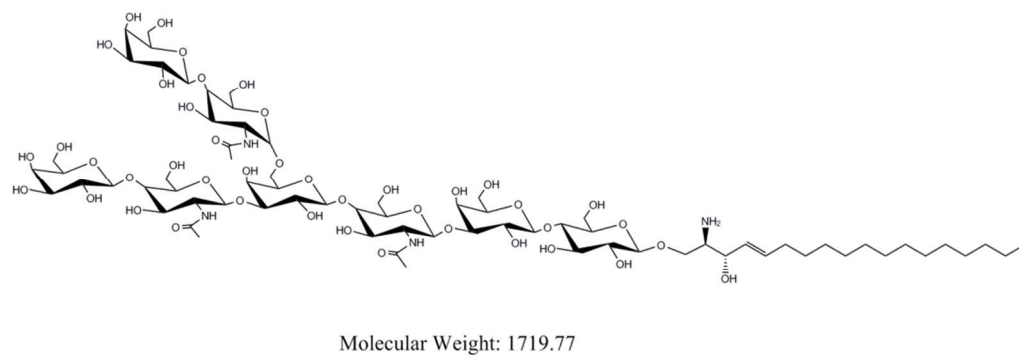

**Figure S11.** Structures of the two isoforms of the putative neolacto GSL ligand of CTB<sub>5</sub>.
